# Supplementary material for: Accentuating the ambient curing behavior of geopolymers: metamodel-guided optimization for fast-curing geopolymers with high flexural strength
Source: Royal Society of Chemistry journal article supplement (doi:10.1039/d4dd00217b), 2025-01-01
Supplement: d4dd00217b1.pdf [file d4dd00217b1.pdf]

## Supplementary Materials

for

### Accentuating the Ambient Curing Behavior of Geopolymers: Metamodel-Guided Optimization for Fast-Curing Geopolymers with High Flexural Strength

Kyungwon Kim<sup>a,b,†</sup>, Hyejeong Song<sup>c,d,†</sup>, Sanghun Lee<sup>d</sup>, Hyung Mi Lim<sup>a</sup>, Hyunseok Ko<sup>d,\*</sup>

<sup>a</sup> Division of Aerospace Convergence Materials Center, Korea Institute of Ceramic Engineering and Technology, Jinju, Gyeongsang-namdo, 52851, Republic of Korea

<sup>b</sup> School of Convergence Science, Pusan National University, Busan, 46241, Republic of Korea

<sup>c</sup> School of Materials Science and Engineering, Korea University, Seoul, 46241, Republic of Korea

<sup>d</sup> Center of Materials Digitalization, Korea Institute of Ceramic Engineering and Technology, Jinju, Gyeongsang-namdo, 52851, Republic of Korea

\* Corresponding author.

E-mail: hko@kicet.re.kr

## 20 Supplementary Information Text

21 Table S1 summarizes the molar ratios of raw materials and curing conditions presented in  
22 the geopolymer literatures. While various studies exist, it is noteworthy that  
23 geopolymers do not have a consistency in the formulation nor the process. As shown,  
24 the molar ratio is distributed for a wide range, and the curing condition varies from  
25 one study to another.

26 Table S2 – S4 show the weight of raw materials, molar ratio, and measured flexural  
27 strength and curing time for *D1-D3*.

28 Table S5 contains the raw XRD data for Kaolin, Metakaolin, and Geopolymer as shown in  
29 Figure 2 (a) of the manuscript.

30 Table S6 A table has been prepared to organize the abbreviations used throughout the  
31 manuscript. This provides clarity and ensures consistency for readers as they  
32 navigate the document.

33 Figure S1 presents (a) XRF component analysis table of metakaolin, showing a  
34 distribution of  $\text{SiO}_2$  and  $\text{Al}_2\text{O}_3$  of 97% or more, and (b) images of silicone mold  
35 (specifications according to ASTM D 790) and fabricated specimens for flexural  
36 strength.

37 Figure S2 shows the initial assessment of the effect of  $\text{Ca(OH)}_2$  contents on the flexural  
38 strength. It is discovered that the strength tends to increase with  $\text{Ca(OH)}_2$  contents  
39 up to 2.5 g, but beyond that amount, the formability of GP becomes poor; it cannot  
40 be stirred nor consolidated.

41 Figure S3 is an index that measures the average difference between the value predicted by  
42 the prediction model and the actual value, and is a graph that estimates how well the  
43 prediction model can predict accurately. The lower the error value, the more reliable  
44 the modeling.

45 Figure S4 shows the correlation matrix plot for variables in geopolymer fabrication.

46 Figure S5 illustrates elemental analysis other than Ca presented in the maintext (Si, Al, O  
47 and K). The Si, Al, and K are depleted in the regions where Ca compounds were  
48 found in Figure 7 of maintext, indicating the Ca compounds are formed first and

49           geopolymer hardly co-exist with Ca compounds.

50       Figure S6 presents the results of thermogravimetry analysis (TGA) was used to evaluate  
51       high temperature performance.

Table S1. Summary of molar ratios and test preparation (curing time and curing conditions) of high strength samples in the geopolymer literature.

| Author (First only)        | Year | SiO <sub>2</sub> /<br>Al <sub>2</sub> O <sub>3</sub> | M <sub>2</sub> O/<br>Al <sub>2</sub> O <sub>3</sub> | M <sub>2</sub> O/<br>SiO <sub>2</sub> | H <sub>2</sub> O/<br>M <sub>2</sub> O | Curing time<br>(day) | Curing condition                                                                                                                                         |
|----------------------------|------|------------------------------------------------------|-----------------------------------------------------|---------------------------------------|---------------------------------------|----------------------|----------------------------------------------------------------------------------------------------------------------------------------------------------|
| Peigang He                 | 2016 | 2.5                                                  | 1                                                   | 0.4                                   | 11                                    | 3                    | Sealed at 70°C, for 24h                                                                                                                                  |
| Kalaiyarrasi               | 2018 | 2.89                                                 | 0.11                                                | 0.04                                  | 17                                    | 28                   | Room temperature for 48h                                                                                                                                 |
| Rodrigue Cyriaque<br>Kaze  | 2018 | 8.89                                                 | 4.14                                                | 0.47                                  | 4.66                                  | 28                   | Chamber at 23°C, for 3h<br>room temperature and oven at 90°C, for 24h                                                                                    |
| Ali Nazari                 | 2015 | 4.16                                                 | 0.89                                                | 0.21                                  | 21.5                                  | 27                   | Plastic bag for 24h, at 70°C                                                                                                                             |
| Pavel Rovnanik             | 2010 | 4.11                                                 | 0.62                                                | 0.15                                  | 8.84                                  | 28                   | In the first experiment: 10, oven at 40, 60, 80°C for 4h<br>In second experiment : Oven at 40,60,80°C, for 1,2,3,4h<br>after 20°C and humidity above 45% |
| Rashidah Mohamed<br>Hamidi | 2016 | 3.68                                                 | 1.96                                                | 0.53                                  | 14.34                                 | 1                    | Oven at 60°C, for 24h                                                                                                                                    |
| Peng Zhang                 | 2020 | 4.29                                                 | 1.3                                                 | 0.3                                   | 1.82                                  | 28                   | Demolded at room temperature, for 24h<br>The temperature of 20°C and humidity above 95%                                                                  |
| Huang Ji Zhuang            | 2017 | 3.23                                                 | 1.92                                                | 0.6                                   | 2.46                                  | 35                   | The temperature of 20°C and humidity above 95%<br>after 6days follow-up curing                                                                           |
| Pradip Nath                | 2017 | 4.51                                                 | 1.41                                                | 0.31                                  | 2.7                                   | 90                   | 18-23°C and relative 70% for 24h                                                                                                                         |
| Harun Tanyildizi           | 2016 | 7.07                                                 | 1.69                                                | 0.24                                  | 6.95                                  | 28                   | Oven at 60, 80, 100 60,80,100°C for 24h<br>and cured at 20°C room temperature                                                                            |
| Shilang Xu                 | 2018 | 5.23                                                 | 4.78                                                | 0.91                                  | 2.42                                  | 28                   | At room temperature (25°C) until the tested                                                                                                              |
| A.Natali                   | 2011 | 3.24                                                 | 1.45                                                | 0.45                                  | 5.24                                  | 7                    | Humidity above 90% in chamber and room temperature for 7days                                                                                             |
| F.N. Okoye                 | 2016 | 3.67                                                 | 0.8                                                 | 0.22                                  | 2.36                                  | 28                   | Oven at 100°C for 72h and room temperature until the tested                                                                                              |
| M. Sofi                    | 2007 | 6.13                                                 | 5.38                                                | 0.88                                  | 4.19                                  | 28                   | Approximately 24h in a steam room<br>(30-35°C, humidity above 80%)                                                                                       |
| C.D. Atisß                 | 2015 | 5.37                                                 | 0.34                                                | 0.06                                  | 28.67                                 | 0.5                  | Heat curing temperature 45 to 115°C,<br>with 10°C curing durations 24,48 and 72h                                                                         |
| Xueying Li                 | 2013 | 7.72                                                 | 0.85                                                | 0.11                                  | 14.61                                 | 28                   | Sealed with a film 1day<br>And oven at 70°C for 24h                                                                                                      |
| Yao Jun Zhang              | 2009 | 3.75                                                 | 2                                                   | 0.53                                  | 13.38                                 | 28                   | Humidity above 99% at 20°C in the chamber                                                                                                                |
| Hafez E. Elyamany          | 2018 | 3.75                                                 | 0.44                                                | 0.12                                  | 10.19                                 | 7                    | Demolded after 24h from casting<br>and oven at 30, 60, 90°C for 48h                                                                                      |
| A.Aboulayt                 | 2017 | 2.27                                                 | 0.3                                                 | 0.13                                  | 17.76                                 | 0.5                  | Oven at 40°C for 12h                                                                                                                                     |

|                             |      |      |      |      |       |    |                                                                                      |
|-----------------------------|------|------|------|------|-------|----|--------------------------------------------------------------------------------------|
| Tanakorn Phoo-<br>ngernkham | 2014 | 4.69 | 1.54 | 0.33 | 11.8  | 90 | Wrapped with vinyl sheet 23°C controlled room                                        |
| Piotr Prochon               | 2020 | 3.55 | 0.59 | 0.17 | 23.08 | 3  | Laboratory conditions for 4h<br>and cured in a dryer at a temperature of 65°C for 4h |

Table S2. The weight of raw materials, molar ratio, and measured flexural strength for *DI*. In *DI*, f-SiO<sub>2</sub> is mainly optimized.

| Sample No.          | Molar ratio                                      |                                                     |                                   |                                   | Weight of input materials (g) |     |                |                    |     |                                 |                  | Measured                        |
|---------------------|--------------------------------------------------|-----------------------------------------------------|-----------------------------------|-----------------------------------|-------------------------------|-----|----------------|--------------------|-----|---------------------------------|------------------|---------------------------------|
|                     | SiO <sub>2</sub> /Al <sub>2</sub> O <sub>3</sub> | Ca(OH) <sub>2</sub> /Al <sub>2</sub> O <sub>3</sub> | K <sub>2</sub> O/SiO <sub>2</sub> | H <sub>2</sub> O/K <sub>2</sub> O | MK                            | Ca  | C <sub>f</sub> | f-SiO <sub>2</sub> | KOH | K <sub>2</sub> SiO <sub>3</sub> | H <sub>2</sub> O | σ <sub>f</sub> (MPa)<br>(stdev) |
| D <sub>1</sub> – 1  | 2.4                                              | 0.4                                                 | 0.2                               | 8.1                               | 20                            | 2.5 | 0.1            | 0                  | 12  | 6                               | 6.2              | 5.14<br>(0.50)                  |
| D <sub>1</sub> – 2  | 2.4                                              | 0.4                                                 | 0.3                               | 5.9                               | 20                            | 2.5 | 0.1            | 0                  | 18  | 6                               | 3.8              | 4.22<br>(0.68)                  |
| D <sub>1</sub> – 3  | 2.4                                              | 0.4                                                 | 0.4                               | 4.7                               | 20                            | 2.5 | 0.1            | 0                  | 24  | 6                               | 1.4              | 4.13<br>(1.00)                  |
| D <sub>1</sub> – 4  | 2.5                                              | 0.4                                                 | 0.2                               | 9.2                               | 20                            | 2.5 | 0.1            | 0                  | 12  | 9                               | 3.2              | 9.65<br>(2.08)                  |
| D <sub>1</sub> – 5  | 2.5                                              | 0.4                                                 | 0.3                               | 6.6                               | 20                            | 2.5 | 0.1            | 0                  | 18  | 9                               | 0                | 10.64<br>(0.91)                 |
| D <sub>1</sub> – 6  | 2.5                                              | 0.4                                                 | 0.4                               | 5.6                               | 20                            | 2.5 | 0.1            | 0                  | 24  | 9                               | 0                | 8.53<br>(1.16)                  |
| D <sub>1</sub> – 7  | 2.7                                              | 0.4                                                 | 0.2                               | 10.1                              | 20                            | 2.5 | 0.1            | 0                  | 12  | 12                              | 0                | 9.58<br>(2.03)                  |
| D <sub>1</sub> – 8  | 2.7                                              | 0.4                                                 | 0.3                               | 7.9                               | 20                            | 2.5 | 0.1            | 0                  | 18  | 12                              | 0                | 7.14<br>(1.07)                  |
| D <sub>1</sub> – 9  | 2.7                                              | 0.4                                                 | 0.4                               | 6.6                               | 20                            | 2.5 | 0.1            | 0                  | 24  | 12                              | 0                | 5.13<br>(1.41)                  |
| D <sub>1</sub> – 10 | 2.4                                              | 0.4                                                 | 0.2                               | 8.1                               | 20                            | 2.5 | 0.1            | 0.3                | 12  | 6                               | 6.2              | 2.71<br>(1.38)                  |
| D <sub>1</sub> – 11 | 2.4                                              | 0.4                                                 | 0.3                               | 5.9                               | 20                            | 2.5 | 0.1            | 0.3                | 18  | 6                               | 3.8              | 1.94<br>(0.63)                  |
| D <sub>1</sub> – 12 | 2.4                                              | 0.4                                                 | 0.4                               | 4.7                               | 20                            | 2.5 | 0.1            | 0.3                | 24  | 6                               | 1.4              | 2.53<br>(1.48)                  |
| D <sub>1</sub> – 13 | 2.6                                              | 0.4                                                 | 0.2                               | 9.2                               | 20                            | 2.5 | 0.1            | 0.3                | 12  | 9                               | 3.2              | 6.30<br>(1.72)                  |
| D <sub>1</sub> – 14 | 2.6                                              | 0.4                                                 | 0.3                               | 6.6                               | 20                            | 2.5 | 0.1            | 0.3                | 18  | 9                               | 0                | 10.07<br>(2.45)                 |

|                     |     |     |     |      |    |     |     |     |    |    |     |                 |
|---------------------|-----|-----|-----|------|----|-----|-----|-----|----|----|-----|-----------------|
| D <sub>1</sub> – 15 | 2.6 | 0.4 | 0.4 | 5.6  | 20 | 2.5 | 0.1 | 0.3 | 24 | 9  | 0   | 7.71<br>(1.04)  |
| D <sub>1</sub> – 16 | 2.8 | 0.4 | 0.2 | 10.1 | 20 | 2.5 | 0.1 | 0.3 | 12 | 12 | 0   | 7.83<br>(2.17)  |
| D <sub>1</sub> – 17 | 2.8 | 0.4 | 0.3 | 7.9  | 20 | 2.5 | 0.1 | 0.3 | 18 | 12 | 0   | 5.97<br>(1.57)  |
| D <sub>1</sub> – 18 | 2.8 | 0.4 | 0.4 | 6.6  | 20 | 2.5 | 0.1 | 0.3 | 24 | 12 | 0   | 3.13<br>(0.64)  |
| D <sub>1</sub> – 19 | 2.5 | 0.4 | 0.2 | 8.1  | 20 | 2.5 | 0.1 | 0.6 | 12 | 6  | 6.2 | 4.13<br>(0.50)  |
| D <sub>1</sub> – 20 | 2.5 | 0.4 | 0.3 | 5.9  | 20 | 2.5 | 0.1 | 0.6 | 18 | 6  | 3.8 | 3.55<br>(1.00)  |
| D <sub>1</sub> – 21 | 2.5 | 0.4 | 0.4 | 4.7  | 20 | 2.5 | 0.1 | 0.6 | 24 | 6  | 1.4 | 8.60<br>(3.15)  |
| D <sub>1</sub> – 22 | 2.7 | 0.4 | 0.2 | 9.2  | 20 | 2.5 | 0.1 | 0.6 | 12 | 9  | 3.2 | 8.71<br>(3.57)  |
| D <sub>1</sub> – 23 | 2.7 | 0.4 | 0.4 | 5.6  | 20 | 2.5 | 0.1 | 0.6 | 24 | 9  | 0   | 8.10<br>(1.63)  |
| D <sub>1</sub> – 24 | 2.8 | 0.4 | 0.2 | 10.1 | 20 | 2.5 | 0.1 | 0.6 | 12 | 12 | 0   | 7.87<br>(1.50)  |
| D <sub>1</sub> – 25 | 2.8 | 0.4 | 0.3 | 7.9  | 20 | 2.5 | 0.1 | 0.6 | 18 | 12 | 0   | 14.49<br>(3.52) |
| D <sub>1</sub> – 26 | 2.8 | 0.4 | 0.3 | 6.6  | 20 | 2.5 | 0.1 | 0.6 | 24 | 12 | 0   | 10.48<br>(3.12) |

Table S3. The weight of raw materials, molar ratio, and measured flexural strength and curing time for *D2*.

| Sample No.         | Molar ratio                                      |                                                     |                                   |                                   | Weight of input materials (g) |     |                |                    |     |                                 |                  | Measured                        |                 |
|--------------------|--------------------------------------------------|-----------------------------------------------------|-----------------------------------|-----------------------------------|-------------------------------|-----|----------------|--------------------|-----|---------------------------------|------------------|---------------------------------|-----------------|
|                    | SiO <sub>2</sub> /Al <sub>2</sub> O <sub>3</sub> | Ca(OH) <sub>2</sub> /Al <sub>2</sub> O <sub>3</sub> | K <sub>2</sub> O/SiO <sub>2</sub> | H <sub>2</sub> O/K <sub>2</sub> O | MK                            | Ca  | C <sub>f</sub> | f-SiO <sub>2</sub> | KOH | K <sub>2</sub> SiO <sub>3</sub> | H <sub>2</sub> O | σ <sub>f</sub> (MPa)<br>(stdev) | Curing time (m) |
| D <sub>2</sub> – 1 | 2.7                                              | 0.4                                                 | 0.2                               | 11.7                              | 20                            | 2.5 | 0.1            | 0.6                | 9   | 9                               | 5.6              | 9.77<br>(2.91)                  | 21              |
| D <sub>2</sub> – 2 | 2.8                                              | 0.4                                                 | 0.2                               | 12.9                              | 20                            | 2.5 | 0.1            | 0.6                | 9   | 12                              | 3.8              | 8.24<br>(2.38)                  | 40              |
| D <sub>2</sub> – 3 | 3.0                                              | 0.4                                                 | 0.2                               | 14.1                              | 20                            | 2.5 | 0.1            | 0.6                | 9   | 15                              | 2                | 8.63<br>(1.03)                  | -               |
| D <sub>2</sub> – 4 | 2.7                                              | 0.4                                                 | 0.2                               | 9.1                               | 20                            | 2.5 | 0.1            | 0.6                | 12  | 9                               | 2.6              | 13.72<br>(3.01)                 | 19              |
| D <sub>2</sub> – 5 | 2.8                                              | 0.4                                                 | 0.2                               | 10.3                              | 20                            | 2.5 | 0.1            | 0.6                | 12  | 12                              | 0.8              | 12.28<br>(2.48)                 | 32              |
| D <sub>2</sub> – 6 | 3.0                                              | 0.4                                                 | 0.2                               | 11.5                              | 20                            | 2.5 | 0.1            | 0.6                | 12  | 15                              | 0                | 12.42<br>(1.63)                 | -               |
| D <sub>2</sub> – 7 | 2.8                                              | 0.4                                                 | 0.2                               | 8.8                               | 20                            | 2.5 | 0.1            | 0.6                | 15  | 12                              | 0                | 11.3<br>(2.46)                  | 44              |
| D <sub>2</sub> – 8 | 3.0                                              | 0.4                                                 | 0.2                               | 10.1                              | 20                            | 2.5 | 0.1            | 0.6                | 15  | 15                              | 0                | 8.53<br>(2.46)                  | 50              |



Table S4. The weight of raw materials, molar ratio, and measured flexural strength and curing time for *D3*.

| Sample No.          | Molar ratio                                      |                                                     |                                   |                                   | Weight of input materials (g) |     |                |                    |     |                                 |                  | Measured                       |                    |
|---------------------|--------------------------------------------------|-----------------------------------------------------|-----------------------------------|-----------------------------------|-------------------------------|-----|----------------|--------------------|-----|---------------------------------|------------------|--------------------------------|--------------------|
|                     | SiO <sub>2</sub> /Al <sub>2</sub> O <sub>3</sub> | Ca(OH) <sub>2</sub> /Al <sub>2</sub> O <sub>3</sub> | K <sub>2</sub> O/SiO <sub>2</sub> | H <sub>2</sub> O/K <sub>2</sub> O | MK                            | Ca  | C <sub>f</sub> | f-SiO <sub>2</sub> | KOH | K <sub>2</sub> SiO <sub>3</sub> | H <sub>2</sub> O | $\sigma_f$<br>(MPa)<br>(stdev) | Curing<br>time (m) |
| D <sub>3</sub> – 1  | 2.4                                              | 0.4                                                 | 0.2                               | 7.3                               | 20                            | 2.5 | 0.1            | 0.6                | 12  | 5                               | 5.6              | 14.03<br>(2.79)                | 12                 |
| D <sub>3</sub> – 2  | 2.4                                              | 0.4                                                 | 0.2                               | 6.0                               | 20                            | 2.5 | 0.1            | 0.6                | 15  | 5                               | 3.8              | 13.33<br>(2.25)                | 24                 |
| D <sub>3</sub> – 3  | 2.4                                              | 0.4                                                 | 0.3                               | 5.1                               | 20                            | 2.5 | 0.1            | 0.6                | 18  | 5                               | 2                | 10.93<br>(6.83)                | 60                 |
| D <sub>3</sub> – 4  | 2.6                                              | 0.4                                                 | 0.2                               | 7.9                               | 20                            | 2.5 | 0.1            | 0.6                | 12  | 7                               | 2.6              | 18.76<br>(6.07)                | 9                  |
| D <sub>3</sub> – 5  | 2.6                                              | 0.4                                                 | 0.2                               | 6.5                               | 20                            | 2.5 | 0.1            | 0.6                | 15  | 7                               | 0.8              | 17.67<br>(6.43)                | 20                 |
| D <sub>3</sub> – 6  | 2.6                                              | 0.4                                                 | 0.3                               | 5.7                               | 20                            | 2.5 | 0.1            | 0.6                | 18  | 7                               | 0                | 16.95<br>(5.21)                | 45                 |
| D <sub>3</sub> – 7  | 2.7                                              | 0.4                                                 | 0.2                               | 8.5                               | 20                            | 2.5 | 0.1            | 0.6                | 12  | 9                               | 0                | 27.83<br>(2.59)                | 7                  |
| D <sub>3</sub> – 8  | 2.7                                              | 0.4                                                 | 0.2                               | 7.4                               | 20                            | 2.5 | 0.1            | 0.6                | 15  | 9                               | 0                | 19.85<br>(4.90)                | 19                 |
| D <sub>3</sub> – 9  | 2.7                                              | 0.4                                                 | 0.3                               | 6.6                               | 20                            | 2.5 | 0.1            | 0.6                | 18  | 9                               | 0                | 17.73<br>(7.35)                | 43                 |
| D <sub>3</sub> – 10 | 2.6                                              | 0.4                                                 | 0.2                               | 7.6                               | 20                            | 2.5 | 0.1            | 0.6                | 12  | 7                               | 0                | 11.71<br>(0.60)                | 52                 |
| D <sub>3</sub> – 11 | 2.4                                              | 0.4                                                 | 0.2                               | 9.9                               | 20                            | 2.5 | 0.1            | 0.6                | 9   | 5                               | 9                | 6.1<br>(0.79)                  | 47                 |

Table S5. Raw XRD data of Kaolin, Metakaolin, and Geopolymer. (It has been attached as a separate Excel file)

Table S6. List of Abbreviations also used in the manuscript text and figures.

| Abbreviations      | Definitions                                              |
|--------------------|----------------------------------------------------------|
| GP                 | Geopolymer                                               |
| MK                 | Metakaolin                                               |
| KOH                | Potassium hydroxide                                      |
| $K_2SiO_3$         | Potassium silicate                                       |
| $Ca(OH)_2$         | Calcium hydroxide                                        |
| $C_f$              | Carbon fiber                                             |
| f-SiO <sub>2</sub> | Fumed silica                                             |
| $\sigma_f$         | Flexural strength                                        |
| $\sigma_c$         | Compressive strength                                     |
| DOE                | Design of experiment                                     |
| $W_{KOH}$          | Weight of KOH / Weight of MK                             |
| $W_{c_f}$          | Weight of KOH / Weight of $C_f$                          |
| $W_{K_2SiO_3}$     | Weight of KOH / Weight of $K_2SiO_3$                     |
| $W_{Ca(OH)_2}$     | Weight of KOH / Weight of $Ca(OH)_2$                     |
| $W_{f-SiO_2}$      | Weight of KOH / Weight of f-SiO <sub>2</sub>             |
| $t_{sc}$           | The surface curing time                                  |
| GP <sub>OFC</sub>  | Optimized composition with $C_f$ , f-SiO <sub>2</sub>    |
| GP <sub>OF</sub>   | Optimized composition without $C_f$                      |
| GP <sub>OC</sub>   | Optimized composition without f-SiO <sub>2</sub>         |
| GP <sub>O</sub>    | Optimized composition without $C_f$ , f-SiO <sub>2</sub> |

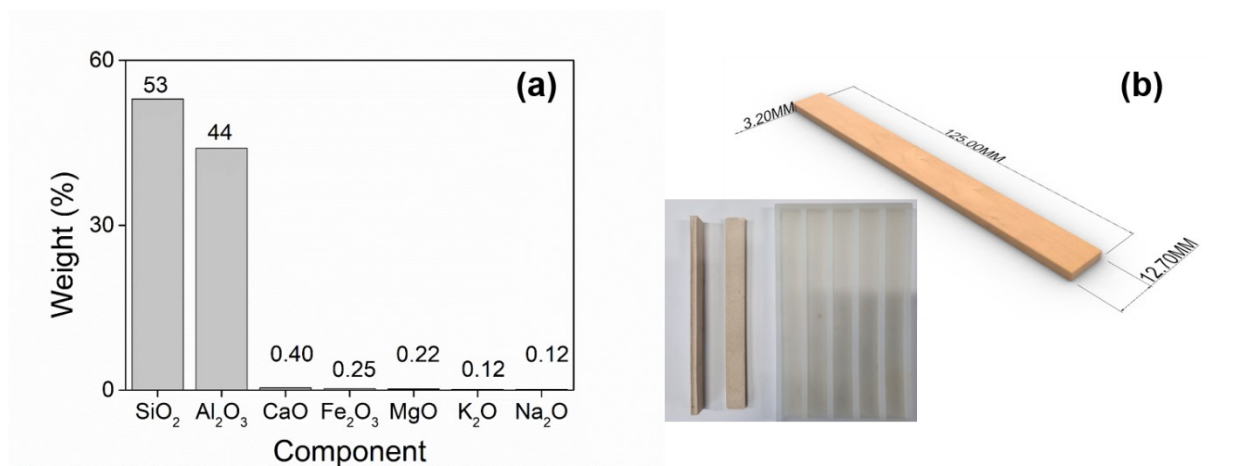

52  
53 Figure S1. (a) Compositional analysis by XRF, and (b) the dimensions of specimen for flexural strength  
54 measurement, and the picture of casted sample in a silicone mold.  
55

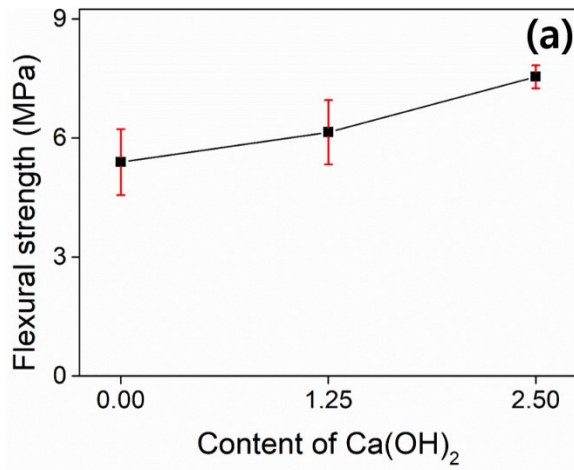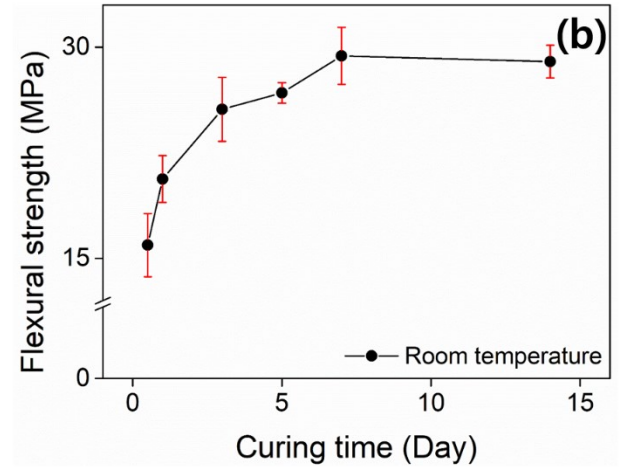

Figure S2. (a) The effect of  $\text{Ca(OH)}_2$  content (g) on the flexural stress of initial GP formulation of  $D_I$ -26, and (b) the flexural stress development as the curing time increases for  $D_3$ -7 at room temperature.

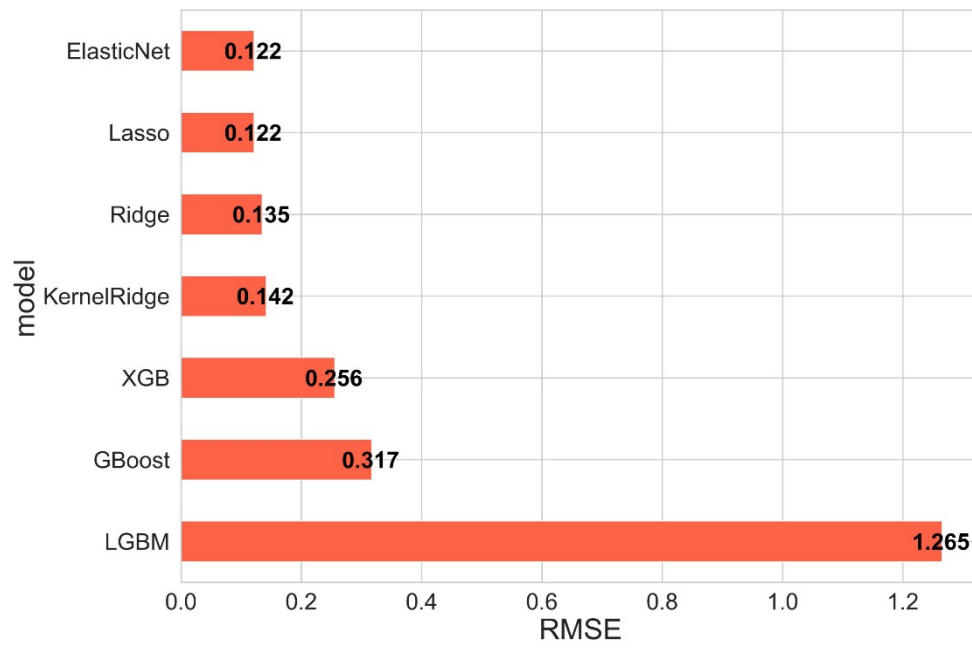

60

61 Figure S3. Types of linear modeling that are effective when using limited data.

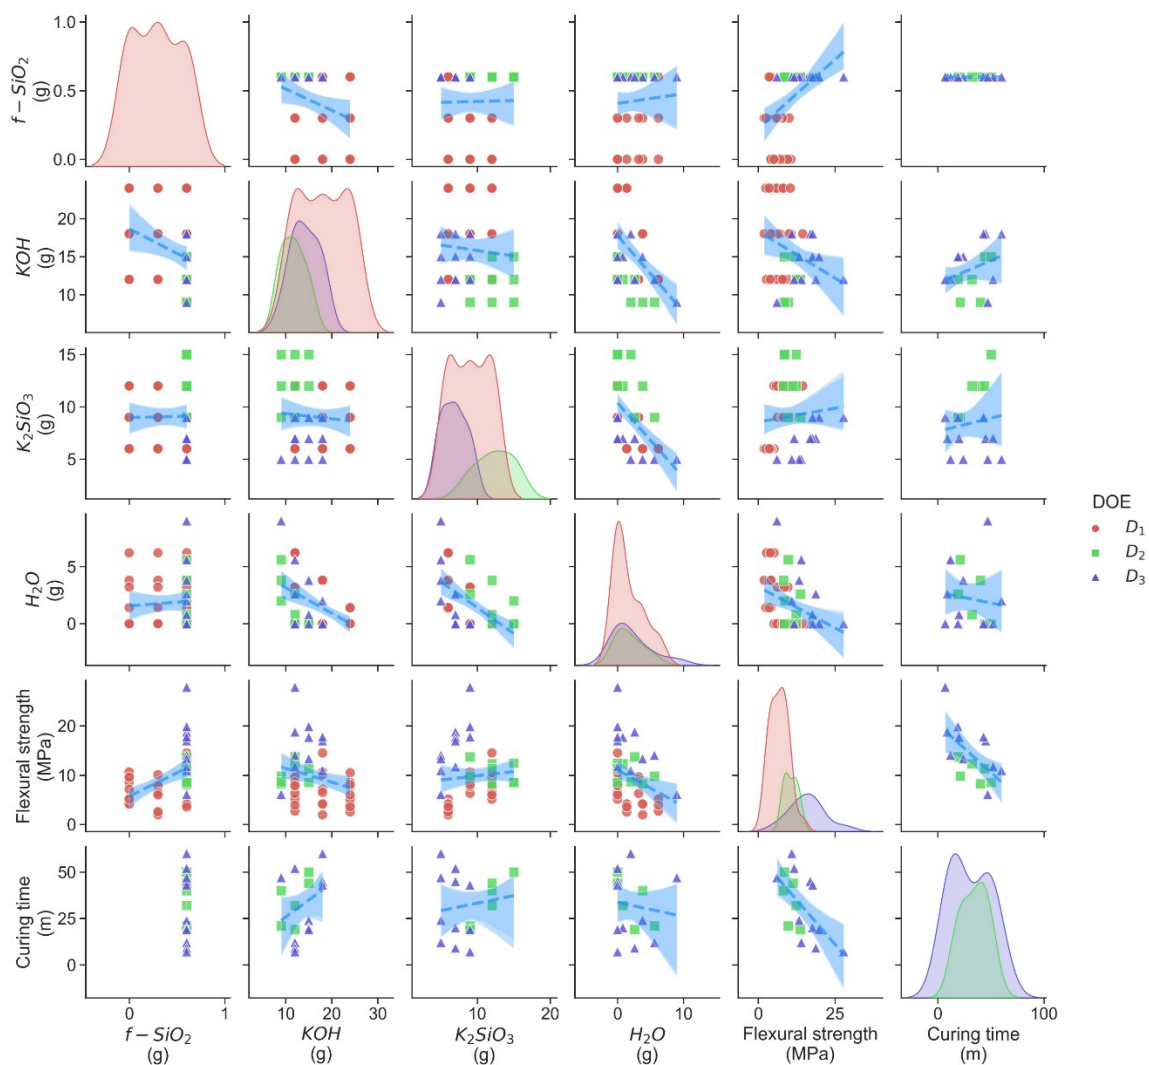

62

63 Figure S4. The correlation matrix plot for variables in geopolymer fabrication.

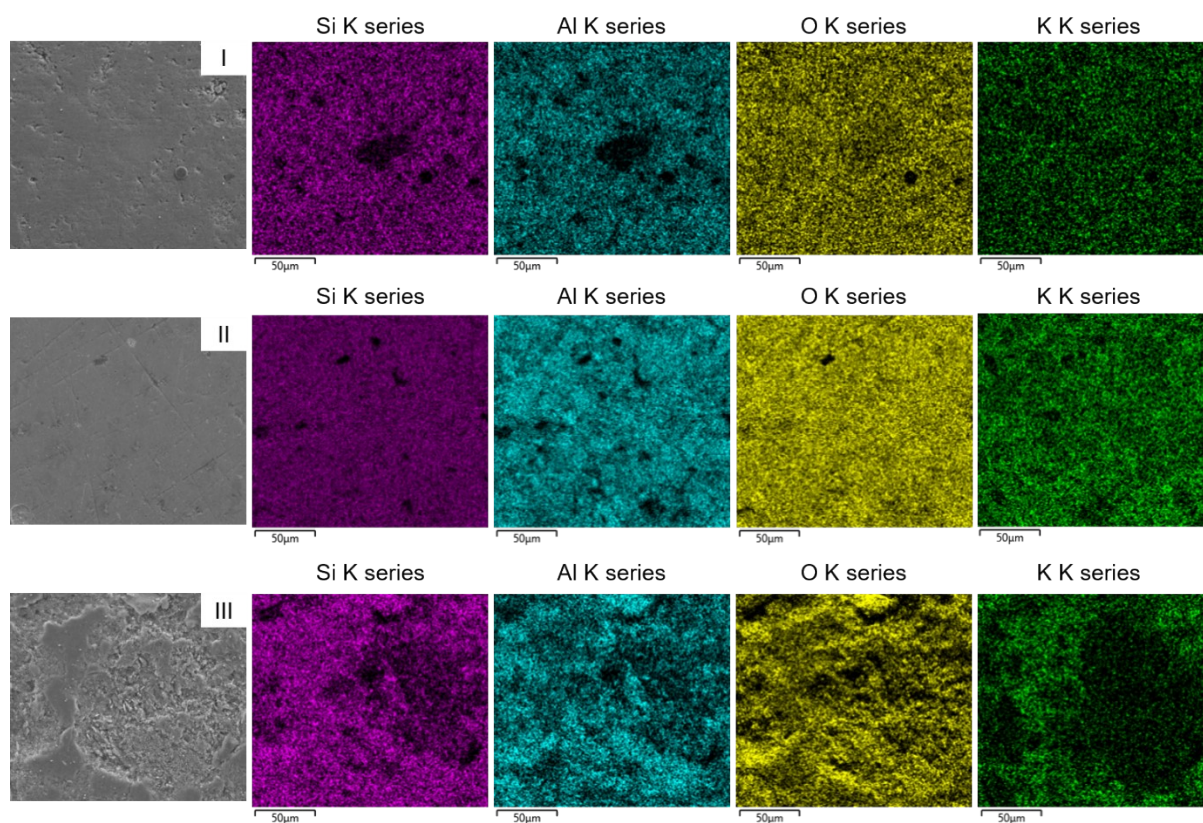

65

66 Figure S5. EDS analysis of other key elements (Si, Al, O, and K) for (I) GP<sub>IFC</sub>, (II) GP<sub>OFC</sub> and (III) GP<sub>OC</sub>.



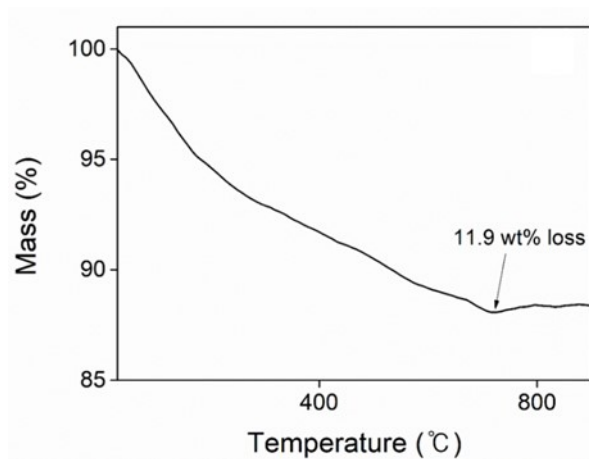

67

68 Figure S6. The weight loss of  $D_3-7$  measured by TGA for temperature change from ambient to 900°C.
