# Supplementary material for: Accentuating the ambient curing behavior of geopolymers: metamodel-guided optimization for fast-curing geopolymers with high flexural strength
Source: Royal Society of Chemistry journal article supplement (doi:10.1039/d4dd00217b), 2025-01-01
Supplement: d4dd00217b2.zip [file d4dd00217b2.zip]

## Sheet: D_1
K2SiO3	KOH	H2O	sigma_f
6	12	6.2	3.92
6	18	3.8	4.13
6	24	1.4	3.56
9	12	3.2	8.6
9	24	0	8.1
12	12	0	7.87
12	18	0	14.49
12	24	0	10.48

## Sheet: D_1-2
K2SiO3	KOH	H2O	sigma_f
6	12	6.2	3.92
6	18	3.8	4.13
6	24	1.4	3.56
9	12	3.2	8.6
9	24	0	8.1
12	12	0	7.87
12	18	0	14.49
12	24	0	10.48
9	9	5.6	9.77
12	9	3.8	8.24
15	9	2	8.63
9	12	2.6	13.72
12	12	0.8	12.28
15	12	0	12.42
12	15	0	11.3
15	15	0	8.53

## Sheet: D_1-3
K2SiO3	KOH	H2O	sigma_f
6	12	6.2	3.92
6	18	3.8	4.13
6	24	1.4	3.56
9	12	3.2	8.6
9	24	0	8.1
12	12	0	7.87
12	18	0	14.49
12	24	0	10.48
9	9	5.6	9.77
12	9	3.8	8.24
15	9	2	8.63
9	12	2.6	13.72
12	12	0.8	12.28
15	12	0	12.42
12	15	0	11.3
15	15	0	8.53
5	12	5.6	14.03
5	15	3.8	13.33
5	18	2	10.93
7	12	2.6	18.76
7	15	0.8	17.67
7	18	0	16.95
9	12	0	27.83
9	15	0	19.85
9	18	0	17.73
7	12	0	11.71
